# Supplementary material
Source: HighWire-hosted journal article supplement (https://jnm.snmjournals.org/highwire/filestream/94388/field_highwire_adjunct_files/0/113324_Supplemental_Data.pdf)
Supplement: 113324_Supplemental_Data.pdf [file 113324_Supplemental_Data.pdf]

## Combination of disulfiram and copper delays spheroid growth.

Multicellular spheroids derived from (A) SK-N-BE(2c) or (B) UVW/NAT cells were treated with disulfiram or  $\text{CuCl}_2$  alone ( $33.7 \mu\text{M}$ ) or in equimolar combination at  $0.337$ ,  $3.37$  or  $33.7 \mu\text{M}$ . Data are expressed as mean spheroid volume at every time point divided by original volume ( $V/V_0$ )  $\pm$  SD of 15 to 24 spheroids per treatment. Abbreviation: DSF (disulfiram).

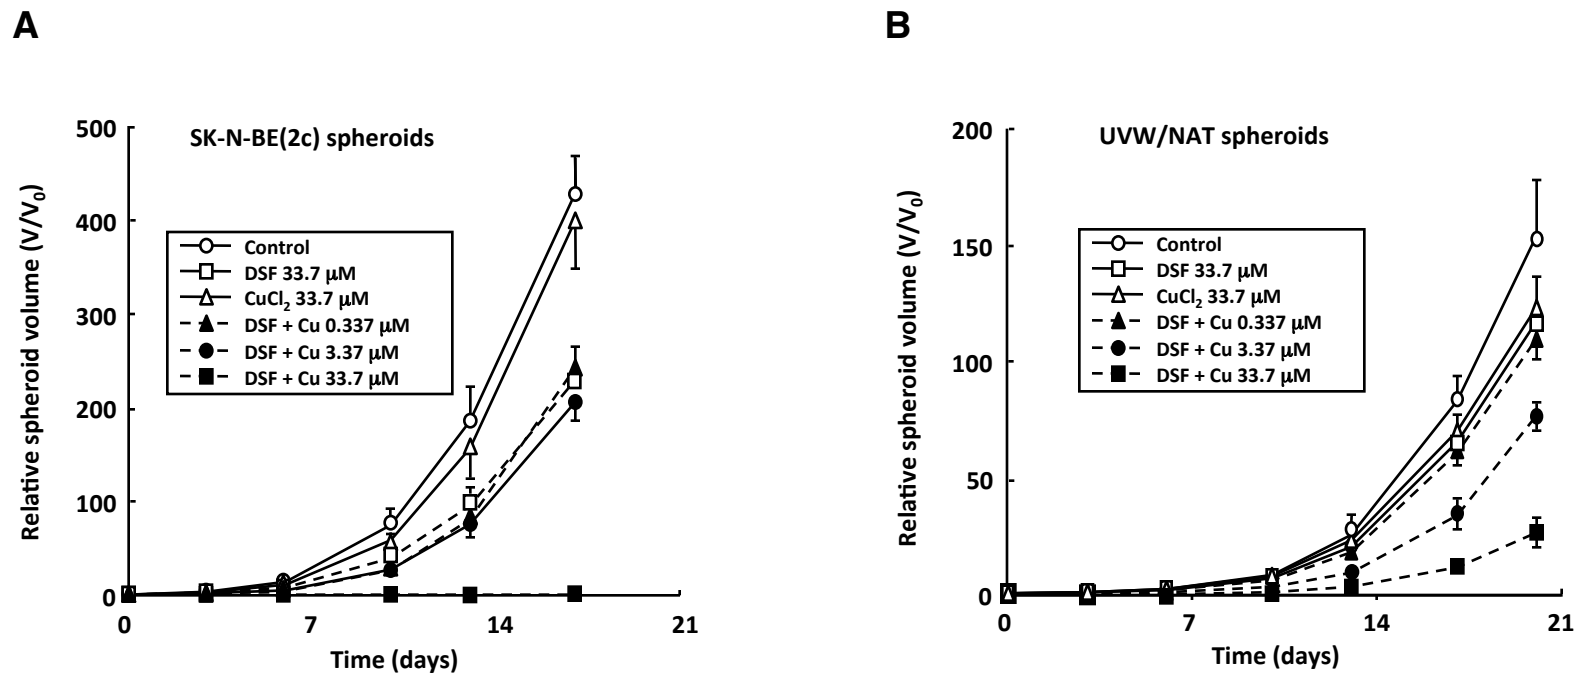

Supplemental Figure 1.
